# Supplementary material for: Genomic analysis and identification of potential duplicate accessions in Burkina Faso cassava germplasm based on single nucleotide polymorphism
Source: Frontiers journal article supplement (doi:10.3389/fsufs.2023.1202015), 2023-06-30
Supplement: Table_1.XLSX [file Table_1.XLSX]

## Sheet: Sheet1
List of SNP markers used for the 184 cassava accessions genotyping
N°	SNP markers	Alleles	Chromosome
1	Me_MEF_c_2368	A/C	1
2	Me_MEF_c_1585	A/C	1
3	Me_MEF_c_1179	C/T	2
4	Me_MEF_c_3217	A/G	2
5	Me_MEF_c_0556	A/C	3
6	Me_MEF_c_1018	A/G	3
7	Me_MEF_c_0936	C/G	4
8	Me_MEF_c_2515	A/T	4
9	Me_MEF_c_0587	A/T	5
10	Me_MEF_c_0869	A/T	5
11	Me_MEF_c_1186	A/C	5
12	Me_MEF_c_0126	C/T	5
13	Me_MEF_c_1671	A/G	6
14	Me_MEF_c_2574	C/G	6
15	Me_MEF_c_0227	A/T	7
16	Me_MEF_c_2644	C/T	7
17	Me_MEF_c_0566	G/T	8
18	Me_MEF_c_2177	A/C	8
19	Me_MEF_c_0153	G/T	9
20	Me_MEF_c_1568	C/T	9
21	Me_MEF_c_1094	A/C	10
22	Me_MEF_c_0262	C/T	10
23	Me_MEF_c_1361	A/G	11
24	Me_MEF_c_2297	A/G	11
25	Me_MEF_c_1074	C/T	12
26	Me_MEF_c_0979	C/T	13
27	Me_MEF_c_0284	C/T	13
28	Me_MEF_c_1187	A/C	14
29	Me_MEF_c_1418	C/T	14
30	Me_MEF_c_2268	C/G	15
31	Me_MEF_c_2911	G/T	15
32	Me_MEF_c_3025	G/T	16
33	Me_MEF_c_3142	C/T	16
34	Me_MEF_c_0981	A/C	17
35	Me_MEF_c_0363	G/T	17
36	Me_MEF_c_1081	C/T	18
