# Supplementary material for: Genomic analysis and identification of potential duplicate accessions in Burkina Faso cassava germplasm based on single nucleotide polymorphism
Source: Frontiers journal article supplement (doi:10.3389/fsufs.2023.1202015), 2023-06-30
Supplement: Table_2.XLSX [file Table_2.XLSX]

## Sheet: Sheet1
Classification of the 166 cassava accessions into clusters based on hierarchical clustering analysis, Bayesian analysis and discriminant analysis of principal components using 34 SNP markers
N°	Accessions	Geographical origin	Breeding patterns	Status	Duplicate MLGs	Dendrogram Clusters	Bayesian analysis clusters	Bayesian analysis assignment probability	DAPC clusters	DAPC assignment probability
1	BFM002	Centre-Ouest	Landrace	MLG		Cluster 2	Cluster 2	0.89	Cluster 16	1
2	BFM004	Centre-Ouest	Landrace	Duplicate	II	Cluster 1	Cluster 1	0.97	Cluster 10	1
3	BFM005	Centre-Ouest	Landrace	Duplicate	XVII	Cluster 2	Cluster 2	0.89	Cluster 16	1
4	BFM007	Centre-Ouest	Landrace	Duplicate	III	Cluster 1	Cluster 1	0.82	Cluster 14	1
5	BFM008	Centre-Ouest	Landrace	MLG		Cluster 1	Cluster 1	0.82	Cluster 14	1
6	BFM009	Centre-Ouest	Landrace	Duplicate	II	Cluster 1	Cluster 1	0.97	Cluster 10	1
7	BFM011	Centre-Ouest	Landrace	MLG		Cluster 1	Admixture	0.74	Cluster 6	1
8	BFM012	Centre-Ouest	Landrace	Duplicate	XIII	Cluster 2	Cluster 2	0.97	Cluster 12	1
9	BFM013	Hauts-Bassins	Landrace	Duplicate	IV	Cluster 1	Cluster 1	0.96	Cluster 11	1
10	BFM014	Hauts-Bassins	Landrace	MLG	XI	Cluster 1	Admixture	0.68	Cluster 4	1
11	BFM015	Hauts-Bassins	Landrace	Duplicate	IV	Cluster 1	Cluster 1	0.96	Cluster 11	1
12	BFM017	Hauts-Bassins	Landrace	Duplicate	II	Cluster 1	Cluster 1	0.97	Cluster 10	1
13	BFM020	Hauts-Bassins	Landrace	Duplicate	VII	Cluster 1	Admixture	0.76	Cluster 6	1
14	BFM023	Centre-Est	Landrace	Duplicate	VII	Cluster 1	Admixture	0.77	Cluster 6	1
15	BFM024	Centre-Est	Landrace	Duplicate	VII	Cluster 1	Admixture	0.76	Cluster 6	1
16	BFM025	Centre-Est	Landrace	Duplicate	VII	Cluster 1	Admixture	0.77	Cluster 6	1
17	BFM027	Centre-Est	Landrace	Duplicate	XVII	Cluster 2	Cluster 2	0.89	Cluster 16	1
18	BFM030	Centre-Est	Landrace	Duplicate	VII	Cluster 1	Admixture	0.74	Cluster 6	1
19	BFM031	Centre-Est	Landrace	MLG		Cluster 1	Admixture	0.67	Cluster 15	1
20	BFM033	Centre-Est	Landrace	MLG	III	Cluster 1	Cluster 1	0.82	Cluster 14	1
21	BFM034	Centre-Est	Landrace	Duplicate	VII	Cluster 1	Admixture	0.74	Cluster 6	1
22	BFM037	Centre-Est	Landrace	Duplicate	VI	Cluster 1	Admixture	0.63	Cluster 4	1
23	BFM039	Centre-Est	Landrace	Duplicate	II	Cluster 1	Cluster 1	0.97	Cluster 10	1
24	BFM043	Centre-Est	Landrace	Duplicate	VII	Cluster 1	Admixture	0.74	Cluster 6	1
25	BFM045	Centre-Est	Landrace	MLG		Cluster 1	Cluster 1	0.97	Cluster 10	1
26	BFM047	Centre-Est	Landrace	Duplicate	XVII	Cluster 2	Cluster 2	0.89	Cluster 16	1
27	BFM048	Centre-Est	Landrace	MLG		Cluster 1	Cluster 1	0.97	Cluster 10	1
28	BFM049	Est	Landrace	MLG	VI	Cluster 1	Admixture	0.63	Cluster 4	1
29	BFM050	Est	Landrace	MLG		Cluster 1	Admixture	0.77	Cluster 6	1
30	BFM052	Est	Landrace	MLG		Cluster 2	Cluster 2	0.94	Cluster 2	1
31	BFM054	Est	Landrace	MLG		Cluster 2	Cluster 2	0.97	Cluster 12	1
32	BFM056	Est	Landrace	Duplicate	VII	Cluster 1	Admixture	0.74	Cluster 6	1
33	BFM057	Est	Landrace	Duplicate	II	Cluster 1	Cluster 1	0.97	Cluster 10	1
34	BFM059	Est	Landrace	MLG		Cluster 2	Cluster 2	0.9	Cluster 3	1
35	BFM061	Est	Landrace	Duplicate	VII	Cluster 1	Admixture	0.74	Cluster 6	1
36	BFM068	Hauts-Bassins	Landrace	Duplicate	II	Cluster 1	Cluster 1	0.97	Cluster 10	1
37	BFM073	Hauts-Bassins	Landrace	MLG	IX	Cluster 1	Admixture	0.66	Cluster 15	1
38	BFM076	Hauts-Bassins	Landrace	MLG	XVII	Cluster 2	Cluster 2	0.89	Cluster 16	1
39	BFM077	Hauts-Bassins	Landrace	Duplicate	IX	Cluster 1	Admixture	0.66	Cluster 15	1
40	BFM078	Hauts-Bassins	Landrace	Duplicate	XIII	Cluster 2	Cluster 2	0.98	Cluster 12	1
41	BFM079	Hauts-Bassins	Landrace	Duplicate	XIII	Cluster 2	Cluster 2	0.97	Cluster 12	1
42	BFM080	Hauts-Bassins	Landrace	Duplicate	XV	Cluster 2	Cluster 2	0.97	Cluster 7	1
43	BFM082	Hauts-Bassins	Landrace	MLG		Cluster 2	Cluster 2	0.89	Cluster 3	1
44	BFM083	Hauts-Bassins	Landrace	MLG		Cluster 2	Cluster 2	0.98	Cluster 12	1
45	BFM086	Hauts-Bassins	Landrace	Duplicate	VII	Cluster 1	Admixture	0.74	Cluster 6	1
46	BFM087	Hauts-Bassins	Landrace	MLG		Cluster 2	Cluster 2	0.87	Cluster 2	1
47	BFM089	Cascades	Landrace	Duplicate	XII	Cluster 2	Cluster 2	0.94	Cluster 2	1
48	BFM093	Cascades	Landrace	Duplicate	XIII	Cluster 2	Cluster 2	0.97	Cluster 12	1
49	BFM096	Hauts-Bassins	Landrace	Duplicate	XIII	Cluster 2	Cluster 2	0.98	Cluster 12	1
50	BFM098	Hauts-Bassins	Landrace	Duplicate	II	Cluster 1	Cluster 1	0.97	Cluster 10	1
51	BFM100	Hauts-Bassins	Landrace	Duplicate	VII	Cluster 1	Admixture	0.74	Cluster 6	1
52	BFM103	Cascades	Landrace	Duplicate	XII	Cluster 2	Cluster 2	0.94	Cluster 2	1
53	BFM105	Cascades	Landrace	MLG		Cluster 1	Cluster 1	0.97	Cluster 10	1
54	BFM116	Cascades	Landrace	Duplicate	II	Cluster 1	Cluster 1	0.97	Cluster 10	1
55	BFM117	Cascades	Landrace	Duplicate	IV	Cluster 1	Cluster 1	0.96	Cluster 11	1
56	BFM124	Cascades	Landrace	Duplicate	II	Cluster 1	Cluster 1	0.97	Cluster 10	1
57	BFM130	Sud-Ouest	Landrace	MLG		Cluster 1	Admixture	0.61	Cluster 4	1
58	BFM134	Centre-Ouest	Landrace	Duplicate	XIII	Cluster 2	Cluster 2	0.98	Cluster 12	1
59	BFM136	Centre-Ouest	Landrace	Duplicate	II	Cluster 1	Cluster 1	0.97	Cluster 10	1
60	BFM138	Cascades	Landrace	Duplicate	VIII	Cluster 1	Admixture	0.55	Cluster 15	1
61	BFM139	Hauts-Bassins	Landrace	MLG		Cluster 1	Cluster 1	0.97	Cluster 10	1
62	BFM142	Hauts-Bassins	Landrace	MLG		Cluster 2	Cluster 2	0.97	Cluster 7	1
63	BFM143	Hauts-Bassins	Landrace	Duplicate	XII	Cluster 2	Cluster 2	0.94	Cluster 2	1
64	BFM144	Hauts-Bassins	Landrace	MLG		Cluster 2	Cluster 2	0.98	Cluster 12	1
65	BFM145	Cascades	Landrace	Duplicate	II	Cluster 1	Cluster 1	0.97	Cluster 10	1
66	BFM148	Cascades	Landrace	Duplicate	XV	Cluster 2	Cluster 2	0.97	Cluster 7	1
67	BFM150	Sud-Ouest	Landrace	MLG		Cluster 2	Cluster 2	0.97	Cluster 7	1
68	BFM151	Centre-Sud	Landrace	Duplicate	XIII	Cluster 2	Cluster 2	0.97	Cluster 12	1
69	BFM152	Hauts-Bassins	Landrace	MLG		Cluster 2	Cluster 2	0.88	Cluster 5	1
70	BFM154	Centre-Sud	Landrace	MLG	II	Cluster 1	Cluster 1	0.97	Cluster 10	1
71	BFM155	Centre-Sud	Landrace	Duplicate	XII	Cluster 2	Cluster 2	0.94	Cluster 2	1
72	BFM156	Centre-Sud	Landrace	Duplicate	XII	Cluster 2	Cluster 2	0.91	Cluster 2	1
73	BFM158	Centre-Sud	Landrace	Duplicate	II	Cluster 1	Cluster 1	0.97	Cluster 10	1
74	BFM159	Centre-Sud	Landrace	Duplicate	XVI	Cluster 2	Cluster 2	0.95	Cluster 8	1
75	BFM162	Centre-Sud	Landrace	MLG		Cluster 2	Cluster 2	0.96	Cluster 8	1
76	BFM164	Centre-Sud	Landrace	Duplicate	II	Cluster 1	Cluster 1	0.97	Cluster 10	1
77	BFM167	Centre-Est	Landrace	MLG		Cluster 2	Cluster 2	0.86	Cluster 16	1
78	BFM169	Centre-Est	Landrace	Duplicate	VII	Cluster 1	Admixture	0.74	Cluster 6	1
79	BFM172	Centre-Est	Landrace	MLG		Cluster 2	Cluster 2	0.89	Cluster 16	1
80	BFM173	Centre-Est	Landrace	MLG		Cluster 2	Admixture	0.55	Cluster 3	1
81	BFM174	Centre-Est	Landrace	Duplicate	II	Cluster 1	Cluster 1	0.97	Cluster 10	1
82	BFM175	Centre-Est	Landrace	MLG		Cluster 2	Admixture	0.54	Cluster 3	1
83	BFM177	Centre-Sud	Landrace	MLG	XVI	Cluster 2	Cluster 2	0.95	Cluster 8	1
84	BFM178	Centre	Improved	Duplicate	XIII	Cluster 2	Cluster 2	0.97	Cluster 12	1
85	BFM179	Centre	Improved	Duplicate	XIII	Cluster 2	Cluster 2	0.98	Cluster 12	1
86	BFM180	Centre	Improved	MLG		Cluster 2	Cluster 2	0.88	Cluster 2	1
87	BFM181	Centre	Improved	MLG		Cluster 2	Cluster 2	0.95	Cluster 5	1
88	BFM182	Centre	Improved	MLG	XII	Cluster 2	Cluster 2	0.94	Cluster 2	1
89	BFM183	Centre	Improved	MLG	XIII	Cluster 2	Cluster 2	0.97	Cluster 12	1
90	BFM184	Centre	Improved	MLG		Cluster 2	Cluster 2	0.83	Cluster 5	1
91	BFM185	Centre	Improved	MLG		Cluster 2	Admixture	0.58	Cluster 13	1
92	BFM186	Sud-Ouest	Landrace	Duplicate	XIII	Cluster 2	Cluster 2	0.98	Cluster 12	1
93	BFM187	Sud-Ouest	Landrace	MLG		Cluster 2	Cluster 2	0.97	Cluster 12	1
94	BFM192	Centre-Est	Landrace	Duplicate	II	Cluster 1	Cluster 1	0.97	Cluster 10	1
95	BFM193	Centre-Ouest	Landrace	MLG	VIII	Cluster 1	Admixture	0.55	Cluster 15	1
96	BFM194	Hauts-Bassins	Landrace	Duplicate	II	Cluster 1	Cluster 1	0.97	Cluster 10	1
97	BFM195	Cascades	Landrace	Duplicate	XV	Cluster 2	Cluster 2	0.97	Cluster 7	1
98	BFM196	Cascades	Landrace	Duplicate	XII	Cluster 2	Cluster 2	0.94	Cluster 2	1
99	BFM197	Cascades	Landrace	Duplicate	X	Cluster 1	Admixture	0.5	Cluster 4	1
100	BFM198	Hauts-Bassins	Landrace	MLG		Cluster 2	Cluster 2	0.88	Cluster 3	1
101	BFM199	Cascades	Landrace	Duplicate	XII	Cluster 2	Cluster 2	0.94	Cluster 2	1
102	BFM200	Cascades	Landrace	Duplicate	II	Cluster 1	Cluster 1	0.97	Cluster 10	1
103	BFM201	Cascades	Landrace	Duplicate	XIV	Cluster 2	Cluster 2	0.9	Cluster 3	1
104	BFM202	Cascades	Landrace	Duplicate	XV	Cluster 2	Cluster 2	0.97	Cluster 7	1
105	BFM205	Centre-Sud	Landrace	Duplicate	II	Cluster 1	Cluster 1	0.97	Cluster 10	1
106	BFM206	Centre-Ouest	Landrace	MLG		Cluster 1	Cluster 1	0.97	Cluster 10	1
107	BFM207	Hauts-Bassins	Landrace	Duplicate	II	Cluster 1	Cluster 1	0.97	Cluster 10	1
108	BFM208	Hauts-Bassins	Landrace	Duplicate	XV	Cluster 2	Cluster 2	0.97	Cluster 7	1
109	BFM209	Hauts-Bassins	Landrace	Duplicate	XI	Cluster 1	Admixture	0.67	Cluster 4	1
110	BFM210	Hauts-Bassins	Landrace	MLG		Cluster 2	Cluster 2	0.83	Cluster 5	1
111	BFM211	Centre-Ouest	Landrace	MLG	I	Cluster 1	Cluster 1	0.96	Cluster 10	1
112	BFM212	Hauts-Bassins	Landrace	Duplicate	II	Cluster 1	Cluster 1	0.97	Cluster 10	1
113	BFM213	Hauts-Bassins	Landrace	MLG		Cluster 2	Cluster 2	0.9	Cluster 3	1
114	BFM214	Cascades	Landrace	MLG	XIV	Cluster 2	Cluster 2	0.9	Cluster 3	1
115	BFM215	Cascades	Landrace	Duplicate	II	Cluster 1	Cluster 1	0.97	Cluster 10	1
116	BFM216	Cascades	Landrace	Duplicate	IV	Cluster 1	Cluster 1	0.96	Cluster 11	1
117	BFM218	Cascades	Landrace	MLG		Cluster 1	Admixture	0.53	Cluster 9	1
118	BFM219	Cascades	Landrace	MLG		Cluster 1	Admixture	0.52	Cluster 9	1
119	BFM220	Cascades	Landrace	MLG		Cluster 1	Admixture	0.68	Cluster 9	1
120	BFM221	Cascades	Landrace	Duplicate	I	Cluster 1	Cluster 1	0.96	Cluster 10	1
121	BFM222	Cascades	Landrace	Duplicate	XV	Cluster 2	Cluster 2	0.97	Cluster 7	1
122	BFM223	Cascades	Landrace	Duplicate	V	Cluster 1	Admixture	0.54	Cluster 9	1
123	BFM224	Cascades	Landrace	Duplicate	XIV	Cluster 2	Cluster 2	0.9	Cluster 3	1
124	BFM225	Cascades	Landrace	MLG	V	Cluster 1	Admixture	0.54	Cluster 9	1
125	BFM226	Cascades	Landrace	MLG		Cluster 1	Admixture	0.52	Cluster 9	1
126	BFM227	Cascades	Landrace	Duplicate	II	Cluster 1	Cluster 1	0.97	Cluster 10	1
127	BFM228	Cascades	Landrace	MLG		Cluster 1	Cluster 1	0.96	Cluster 11	1
128	BFM229	Hauts-Bassins	Landrace	MLG		Cluster 1	Cluster 1	0.97	Cluster 10	1
129	BFM230	Hauts-Bassins	Landrace	MLG		Cluster 1	Cluster 1	0.97	Cluster 10	1
130	BFM231	Hauts-Bassins	Landrace	Duplicate	II	Cluster 1	Cluster 1	0.97	Cluster 10	1
131	BFM232	Hauts-Bassins	Landrace	MLG		Cluster 1	Admixture	0.78	Cluster 9	1
132	BFM233	Hauts-Bassins	Landrace	MLG		Cluster 2	Cluster 2	0.86	Cluster 3	1
133	BFM234	Centre-Sud	Landrace	MLG		Cluster 1	Admixture	0.54	Cluster 9	1
134	BFM235	Centre-Sud	Landrace	MLG		Cluster 1	Cluster 1	0.97	Cluster 10	1
135	BFM236	Centre-Sud	Landrace	Duplicate	VI	Cluster 1	Admixture	0.63	Cluster 4	1
136	BFM237	Hauts-Bassins	Landrace	Duplicate	II	Cluster 1	Cluster 1	0.97	Cluster 10	1
137	BFM238	Centre-Sud	Landrace	Duplicate	XVI	Cluster 2	Cluster 2	0.95	Cluster 8	1
138	BFM239	Centre-Sud	Landrace	MLG		Cluster 2	Cluster 2	0.95	Cluster 8	1
139	BFM241	Centre-Sud	Landrace	Duplicate	II	Cluster 1	Cluster 1	0.97	Cluster 10	1
140	BFM243	Centre-Ouest	Landrace	Duplicate	II	Cluster 1	Cluster 1	0.97	Cluster 10	1
141	BFM244	Sud-Ouest	Landrace	MLG		Cluster 2	Cluster 2	0.94	Cluster 2	1
142	BFM247	Centre-Ouest	Landrace	Duplicate	II	Cluster 1	Cluster 1	0.97	Cluster 10	1
143	BFM250	Cascades	Landrace	Duplicate	XII	Cluster 2	Cluster 2	0.94	Cluster 2	1
144	BFM251	Centre-Est	Landrace	MLG	VII	Cluster 1	Admixture	0.74	Cluster 6	1
145	BFM253	Cascades	Landrace	MLG	XV	Cluster 2	Cluster 2	0.97	Cluster 7	1
146	BFM254	Hauts-Bassins	Landrace	MLG	IV	Cluster 1	Cluster 1	0.96	Cluster 11	1
147	BFM255	Hauts-Bassins	Landrace	Duplicate	II	Cluster 1	Cluster 1	0.97	Cluster 10	1
148	BFM256	Hauts-Bassins	Landrace	MLG		Cluster 1	Cluster 1	0.95	Cluster 11	1
149	BFM258	Cascades	Landrace	MLG		Cluster 1	Cluster 1	0.97	Cluster 10	1
150	BFM259	Centre-Est	Landrace	Duplicate	XVII	Cluster 2	Cluster 2	0.92	Cluster 16	1
151	BFM260	Centre-Est	Landrace	Duplicate	II	Cluster 1	Cluster 1	0.97	Cluster 10	1
152	BFM261	Hauts-Bassins	Landrace	MLG		Cluster 2	Cluster 2	0.82	Cluster 5	1
153	BFM263	Hauts-Bassins	Landrace	Duplicate	IV	Cluster 1	Cluster 1	0.96	Cluster 11	1
154	BFM264	Centre-Ouest	Landrace	MLG		Cluster 1	Admixture	0.68	Cluster 4	1
155	BFM267	Sud-Ouest	Landrace	MLG	X	Cluster 1	Admixture	0.5	Cluster 4	1
156	BFM268	Centre	Improved	MLG		Cluster 1	Admixture	0.55	Cluster 17	1
157	BFM269	Centre	Improved	MLG		Cluster 2	Admixture	0.67	Cluster 17	1
158	BFM270	Centre	Improved	MLG		Cluster 2	Admixture	0.59	Cluster 17	1
159	BFM271	Centre	Improved	MLG		Cluster 2	Admixture	0.57	Cluster 17	1
160	BFM272	Centre	Improved	MLG		Cluster 1	Admixture	0.63	Cluster 1	1
161	BFM273	Centre	Improved	MLG		Cluster 2	Admixture	0.58	Cluster 1	1
162	BFM274	Centre	Improved	MLG		Cluster 2	Cluster 2	0.93	Cluster 5	1
163	BFM275	Centre	Improved	MLG		Cluster 2	Cluster 2	0.95	Cluster 13	1
164	BFM276	Centre	Improved	MLG		Cluster 2	Admixture	0.71	Cluster 1	1
165	BFM277	Centre	Improved	MLG		Cluster 2	Admixture	0.76	Cluster 13	1
166	BFM278	Centre	Improved	MLG		Cluster 2	Admixture	0.74	Cluster 13	1
