# Supplementary material for: Genomic analysis and identification of potential duplicate accessions in Burkina Faso cassava germplasm based on single nucleotide polymorphism
Source: Frontiers journal article supplement (doi:10.3389/fsufs.2023.1202015), 2023-06-30
Supplement: Table_3.XLSX [file Table_3.XLSX]

## Sheet: Sheet1
Classification of the 79 unique multilocus genotypes (MLGs) into clusters based on Bayesian analysis and discriminant analysis of principal components using 34 SNP markers
N°	Accessions	Geographical origin	Breeding patterns	Bayesian analysis clusters	Bayesian analysis assignment probability	DAPC clusters	DAPC assignment probability
1	BFM002	Centre-Ouest	Landrace	Group 1	0.966	Group 8	1
2	BFM008	Centre-Ouest	Landrace	Group 6	0.875	Group 6	1
3	BFM011	Centre-Ouest	Landrace	Group 6	0.909	Group 7	0.98
4	BFM014	Hauts-Bassins	Landrace	Admixture	0.624	Group 4	0.97
5	BFM031	Centre-Est	Landrace	Group 6	0.871	Group 7	1
6	BFM033	Centre-Est	Landrace	Group 6	0.890	Group 6	1
7	BFM045	Centre-Est	Landrace	Group 5	0.972	Group 6	1
8	BFM048	Centre-Est	Landrace	Group 5	0.972	Group 6	1
9	BFM049	Est	Landrace	Admixture	0.794	Group 7	0.94
10	BFM050	Est	Landrace	Group 6	0.893	Group 7	0.96
11	BFM052	Est	Landrace	Group 3	0.960	Group 2	1
12	BFM054	Est	Landrace	Group 3	0.959	Group 2	1
13	BFM059	Est	Landrace	Group 2	0.977	Group 4	1
14	BFM073	Hauts-Bassins	Landrace	Group 6	0.909	Group 7	1
15	BFM076	Hauts-Bassins	Landrace	Group 1	0.968	Group 8	1
16	BFM082	Hauts-Bassins	Landrace	Group 2	0.976	Group 4	1
17	BFM083	Hauts-Bassins	Landrace	Group 3	0.970	Group 2	1
18	BFM087	Hauts-Bassins	Landrace	Group 3	0.932	Group 2	1
19	BFM105	Cascades	Landrace	Group 5	0.972	Group 6	1
20	BFM130	Sud-Ouest	Landrace	Admixture	0.699	Group 7	1
21	BFM139	Hauts-Bassins	Landrace	Group 5	0.973	Group 6	1
22	BFM142	Hauts-Bassins	Landrace	Admixture	0.493	Group 1	1
23	BFM144	Hauts-Bassins	Landrace	Group 3	0.958	Group 2	1
24	BFM150	Sud-Ouest	Landrace	Admixture	0.465	Group 1	1
25	BFM152	Hauts-Bassins	Landrace	Admixture	0.789	Admixture	0.74
26	BFM154	Centre-Sud	Landrace	Group 5	0.972	Group 6	1
27	BFM162	Centre-Sud	Landrace	Group 1	0.908	Group 8	1
28	BFM167	Centre-Est	Landrace	Group 1	0.966	Group 8	1
29	BFM172	Centre-Est	Landrace	Group 1	0.967	Group 8	1
30	BFM173	Centre-Est	Landrace	Group 2	0.814	Group 4	1
31	BFM175	Centre-Est	Landrace	Group 2	0.819	Group 4	1
32	BFM177	Centre-Sud	Landrace	Group 1	0.907	Group 8	1
33	BFM180	Centre	Improved	Group 3	0.935	Group 2	1
34	BFM181	Centre	Improved	Admixture	0.647	Group 2	0.98
35	BFM182	Centre	Improved	Group 3	0.961	Group 2	1
36	BFM183	Centre	Improved	Group 3	0.963	Group 2	1
37	BFM184	Centre	Improved	Group 4	0.952	Group 5	0.99
38	BFM185	Centre	Improved	Group 4	0.899	Group 5	1
39	BFM187	Sud-Ouest	Landrace	Group 3	0.964	Group 2	1
40	BFM193	Centre-Ouest	Landrace	Group 6	0.944	Group 7	1
41	BFM198	Hauts-Bassins	Landrace	Group 2	0.976	Group 4	1
42	BFM206	Centre-Ouest	Landrace	Group 5	0.969	Group 6	1
43	BFM210	Hauts-Bassins	Landrace	Admixture	0.770	Group 2	0.98
44	BFM211	Centre-Ouest	Landrace	Group 5	0.968	Group 6	1
45	BFM213	Hauts-Bassins	Landrace	Group 2	0.975	Group 4	1
46	BFM214	Cascades	Landrace	Group 2	0.977	Group 4	1
47	BFM218	Cascades	Landrace	Group 6	0.944	Group 7	1
48	BFM219	Cascades	Landrace	Group 6	0.890	Group 7	1
49	BFM220	Cascades	Landrace	Group 6	0.918	Group 7	1
50	BFM223	Cascades	Landrace	Group 6	0.900	Group 7	1
51	BFM226	Cascades	Landrace	Group 6	0.896	Group 7	1
52	BFM228	Cascades	Landrace	Admixture	0.563	Group 6	1
53	BFM229	Hauts-Bassins	Landrace	Group 5	0.973	Group 6	1
54	BFM230	Hauts-Bassins	Landrace	Group 5	0.973	Group 6	1
55	BFM232	Hauts-Bassins	Landrace	Admixture	0.666	Group 7	1
56	BFM233	Hauts-Bassins	Landrace	Group 2	0.974	Group 4	1
57	BFM234	Centre-Sud	Landrace	Group 6	0.903	Group 7	1
58	BFM235	Centre-Sud	Landrace	Group 5	0.970	Group 6	1
59	BFM239	Centre-Sud	Landrace	Group 1	0.914	Group 8	1
60	BFM244	Sud-Ouest	Landrace	Group 3	0.961	Group 2	1
61	BFM251	Centre-Est	Landrace	Group 6	0.900	Group 7	0.96
62	BFM253	Cascades	Landrace	Admixture	0.464	Group 1	1
63	BFM254	Hauts-Bassins	Landrace	Admixture	0.546	Group 6	1
64	BFM256	Hauts-Bassins	Landrace	Admixture	0.734	Group 6	1
65	BFM258	Cascades	Landrace	Group 5	0.973	Group 6	1
66	BFM261	Hauts-Bassins	Landrace	Admixture	0.759	Group 2	0.98
67	BFM264	Centre-Ouest	Landrace	Admixture	0.742	Group 7	0.92
68	BFM267	Sud-Ouest	Landrace	Admixture	0.654	Group 7	1
69	BFM268	Centre	Improved	Admixture	0.641	Group 3	1
70	BFM269	Centre	Improved	Group 7	0.965	Group 3	1
71	BFM270	Centre	Improved	Group 7	0.849	Group 3	1
72	BFM271	Centre	Improved	Group 7	0.985	Group 3	1
73	BFM272	Centre	Improved	Admixture	0.564	Group 5	1
74	BFM273	Centre	Improved	Admixture	0.499	Group 5	0.98
75	BFM274	Centre	Improved	Group 4	0.953	Group 5	1
76	BFM275	Centre	Improved	Group 4	0.969	Group 5	0.99
77	BFM276	Centre	Improved	Admixture	0.609	Group 5	0.98
78	BFM277	Centre	Improved	Group 4	0.964	Group 5	1
79	BFM278	Centre	Improved	Group 4	0.820	Group 5	1
